# Supplementary material for: A Least Angle Regression Model for the Prediction of Canonical and Non-Canonical miRNA-mRNA Interactions
Source: PubMed Central journal article supplement (PMC3398908; doi:10.1371/journal.pone.0040634), 2012-07-17
Supplement: pone.0040634.s001.pdf [file pone.0040634.s001.pdf]

# Venn Diagram

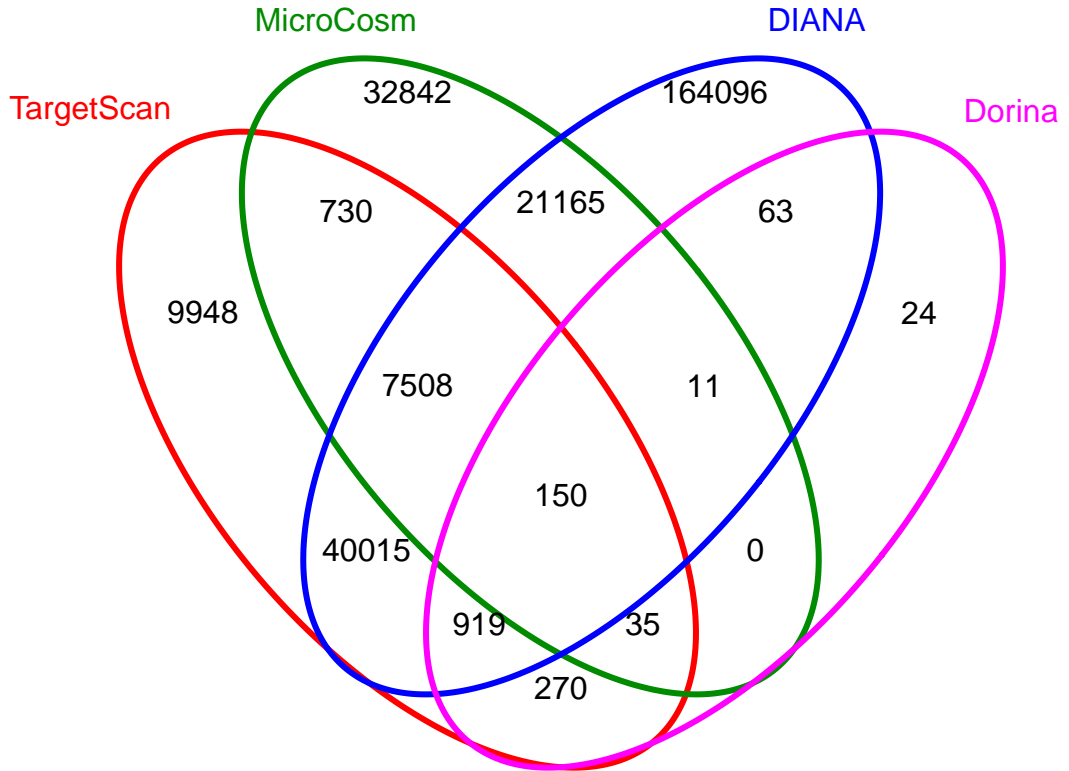

overlap of miRNA target site predictions
